# Supplementary material for: Serosurvey of Treponema pallidum infection among children with skin ulcers in the Tarangire-Manyara ecosystem, northern Tanzania
Source: Springer Nature journal article supplement (doi:10.1186/s12879-020-05105-4), 2020-06-03
Supplement: MOESM2 [file 18046580]

**Additional File 2. Sampling areas and the number of children enrolled at each sampling location.** Schools were not selected on the basis of their exact distance to the respective wildlife area. Instead, we used schools that were accessible to us and that were close to Lake Manyara National Park or Tarangire National Park. The proximity of the facility is only a proxy for the pupils' place of residence.

|                                             | District | Location Name       | GPS Coordinates |           | Total Number of Children | Number of Children Enrolled |
|---------------------------------------------|----------|---------------------|-----------------|-----------|--------------------------|-----------------------------|
| <b>Primary schools</b>                      | Monduli  | Baraka              | -3.359530       | 35.904170 | 620                      | 7                           |
|                                             |          | Majengo             | -3.348670       | 35.865460 | 708                      | 14                          |
|                                             |          | Migombani           | -3.338850       | 35.844140 | 224                      | 24                          |
|                                             |          | Mto wa Mbu          | -3.372998       | 35.850650 | 1,117                    | 7                           |
|                                             |          | Sironga             | -3.473690       | 36.202960 | 142                      | 12                          |
|                                             |          | Kigongoni           | -3.379840       | 35.890580 | 951                      | 14                          |
|                                             |          | Jangwani            | -3.387460       | 35.855600 | 533                      | 12                          |
|                                             | Babati   | Mbugwe              | -3.906720       | 35.805310 | 701                      | 27                          |
|                                             |          | Darajani            | -4.348190       | 35.738810 | 543                      | 14                          |
|                                             |          | Wang'wari           | -4.198860       | 35.772870 | 462                      | 6                           |
|                                             |          | Bonga               | -4.346190       | 35.738990 | 821                      | 9                           |
|                                             |          | Gendi               | -4.246420       | 35.751670 | 613                      | 4                           |
|                                             |          | Managha             | -4.272220       | 35.747770 | 349                      | 29                          |
| <b>Total</b>                                | <b>2</b> | <b>13</b>           |                 |           | <b>7,784</b>             | <b>179</b>                  |
| <b>Health centre (HC) Dispensary (Disp)</b> | Monduli  | Diaconical zac disp | -3.371090       | 35.845940 | unknown                  | 2                           |
|                                             |          | Mungere Disp        | -3.317800       | 35.893000 | unknown                  | 2                           |
|                                             |          | Mto wa Mbu HC       | -3.374327       | 35.889823 | unknown                  | 3                           |
| <b>Total</b>                                | <b>1</b> | <b>3</b>            | -               | -         | unknown                  | <b>7</b>                    |
| <b>Grand total</b>                          | <b>2</b> | <b>16</b>           | -               | -         | -                        | <b>186</b>                  |
