# Supplementary material for: Serosurvey of Treponema pallidum infection among children with skin ulcers in the Tarangire-Manyara ecosystem, northern Tanzania
Source: Springer Nature journal article supplement (doi:10.1186/s12879-020-05105-4), 2020-06-03
Supplement: MOESM4 [file 18046580]

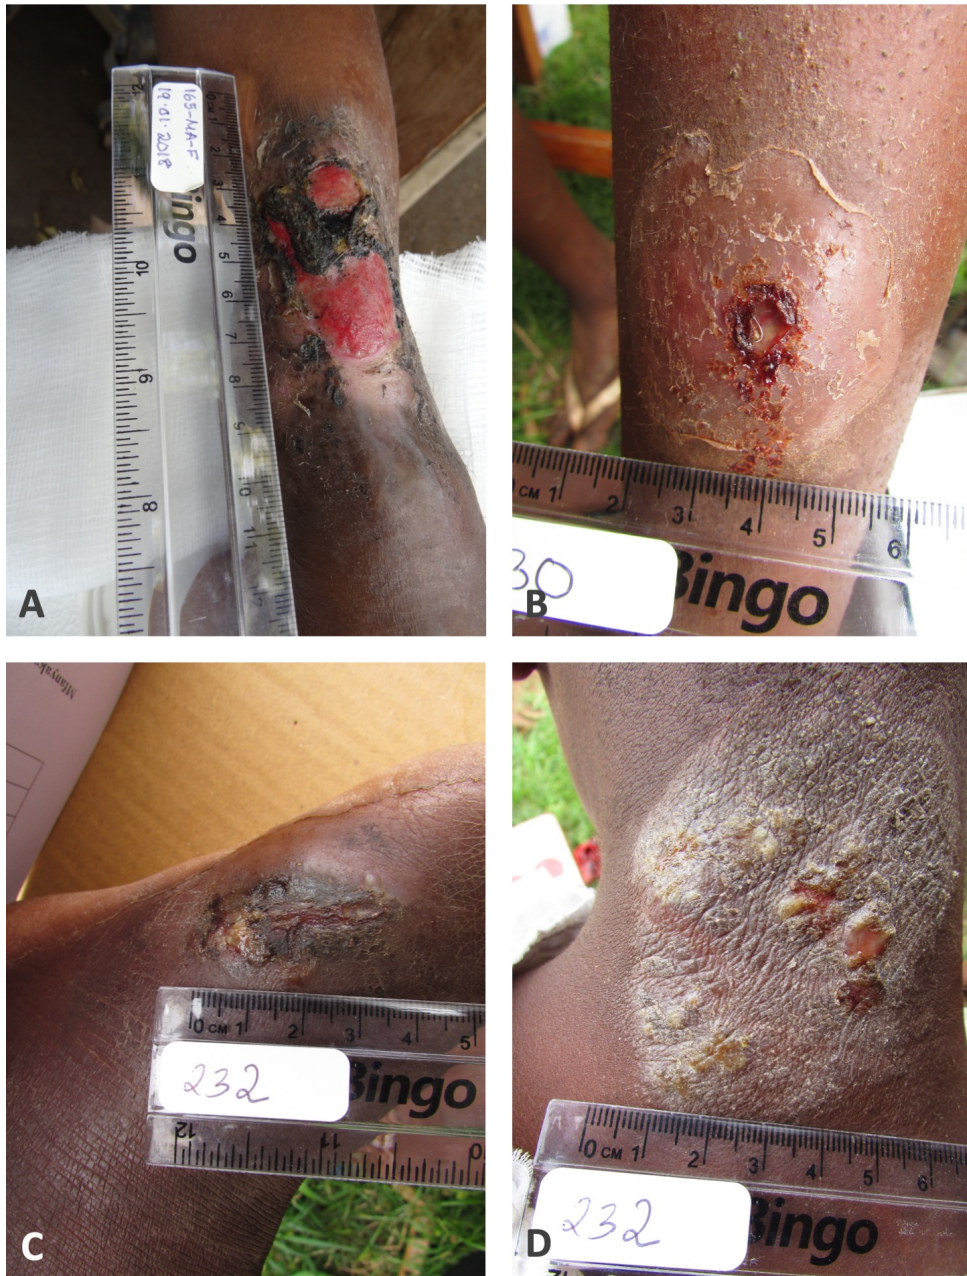

**Additional File 4: Representative skin ulcers greater than 3 cm. (A)** lower limb, 14-year-old girl **(B)** lower limb, 13-year-old boy **(C)** lower limb, 14-year-old girl **(D)** neck, 14-year-old girl. The reported duration of the skin lesions was **(A)**: 366 days, **(B)**: 14 days, **(C)**: 30 days and **(D)**: unknown.
